# Supplementary material for: INTEREST IN CD2, a global patient-centred study of long-term cervical dystonia treatment with botulinum toxin
Source: PubMed Central journal article supplement (PMC5808090; doi:10.1007/s00415-017-8698-2), 2017-12-21
Supplement: 415_2017_8698_MOESM1_ESM.pdf [file 415_2017_8698_MOESM1_ESM.pdf]

## INTEREST IN CD2, a global patient-centred study of long-term cervical dystonia treatment with botulinum toxin

Vijay P Misra,<sup>1</sup> Carlo Colosimo, David Charles, Tae Mo Chung, Pascal Maisonobe, Savary Om on behalf of the INTEREST IN CD2 study group

1. Imperial College Healthcare NHS Trust, London. [peter.misra@virgin.net](mailto:peter.misra@virgin.net)

**Journal of Neurology.**

### Supplementary Appendix: Injection details for Top 5 most frequently injected muscles at baseline

|                                      | Asia<br>(N=143) | Australia<br>(N=40) | Europe<br>(N=620) | Latin America<br>(N=82) | North Africa/<br>Middle East<br>(N=113) | USA<br>(N=38)  | Overall<br>(N=1036) |
|--------------------------------------|-----------------|---------------------|-------------------|-------------------------|-----------------------------------------|----------------|---------------------|
| <b>Splenius capitis</b>              |                 |                     |                   |                         |                                         |                |                     |
| N (%)                                | 113 (79.0)      | 33 (82.5)           | 565 (91.1)        | 68 (82.9)               | 92 (81.4)                               | 33 (86.8)      | 904 (87.3)          |
| Injected volume (mL); median [range] | 0.8 [0.2-5.2]   | 0.7 [0.2-3.0]       | 0.8 [0.1-6.0]     | 0.8 [0.2-3.5]           | 0.8 [0.2-2.7]                           | 0.8 [0.3-2.0]  | 0.8 [0.1-6.0]       |
| Injection points; median [range]     | 2.0 [1-10]      | 2.0 [1-9]           | 2.0 [1-12]        | 2.0 [1-8]               | 2.0 [1-6]                               | 2.0 [1-4]      | 2.0 [1-12]          |
| Injection guidance; n (%)≠           | 35 (31.0)       | 32 (97.0)           | 162 (28.7)        | 1 (1.5)                 | 65 (70.7)                               | 19 (57.6)      | 314 (34.7)          |
| BoNT-A dose (U); median [range]      |                 |                     |                   |                         |                                         |                |                     |
| abobotulinumtoxinA                   | 150 [30-500]    | 275 [100-500]       | 200 [15-1000]     | 150 [50-600]            | 200 [60-650]                            | 200 [75-300]   | 200 [15-1000]       |
| incobotulinumtoxinA                  | -               | -                   | 80 [20-185]       | 40 [30-125]             | -                                       | 87.5 [25-165]  | 80 [20-185]         |
| onabotulinumtoxinA                   | 50 [15-130]     | 75 [18-150]         | 60 [10-300]       | 75 [40-100]             | 60 [25-100]                             | 67.5 [25-200]  | 60 [10-300]         |
| <b>Sternocleidomastoid</b>           |                 |                     |                   |                         |                                         |                |                     |
| N (%)                                | 125 (87.4)      | 25 (62.5)           | 517 (83.4)        | 72 (87.8)               | 94 (83.2)                               | 23 (60.5)      | 856 (82.6)          |
| Injected volume (mL); median [range] | 0.63 [0.1-3.2]  | 0.5 [0.2-1.1]       | 0.5 [0.1-4.0]     | 0.75 [0.2-3.0]          | 0.5 [0.1-2.3]                           | 0.75 [0.2-2.0] | 0.5 [0.1-4.0]       |
| Injection points; median [range]     | 2.0 [1-7]       | 2.0 [1-5]           | 2.0 [1-9]         | 2.5 [1-8]               | 2.0 [1-8]                               | 3.0 [1-6]      | 2.0 [1-9]           |
| Injection guidance; n (%)≠           | 30 (24.0)       | 23 (92.0)           | 130 (25.1)        | 4 (5.6)                 | 62 (66.0)                               | 5 (21.7)       | 254 (29.7)          |
| BoNT-A dose (U); median [range]      |                 |                     |                   |                         |                                         |                |                     |
| abobotulinumtoxinA                   | 122.5 [20-350]  | 150 [100-250]       | 140 [15-550]      | 150 [50-400]            | 100 [50-425]                            | 125 [50-225]   | 125 [15-550]        |
| incobotulinumtoxinA                  | -               | -                   | 40 [10-120]       | 55 [40-60]              | -                                       | 105 [25-200]   | 50 [10-200]         |
| onabotulinumtoxinA                   | 40 [20-100]     | 50 [25-75]          | 40 [10-150]       | 100 [20-100]            | 75 [25-113]                             | 50 [15-200]    | 47.5 [10-200]       |
| <b>Trapezius</b>                     |                 |                     |                   |                         |                                         |                |                     |
| N (%)                                | 90 (62.9)       | 22 (55.0)           | 392 (63.2)        | 58 (70.7)               | 84 (74.3)                               | 20 (52.6)      | 666 (64.3)          |

|                                      |                |                |               |                |                |                |               |
|--------------------------------------|----------------|----------------|---------------|----------------|----------------|----------------|---------------|
| Injected volume (mL); median [range] | 0.5 [0.1-2.5]  | 0.5 [0.2-1.6]  | 0.6 [0.1-4.5] | 0.78 [0.2-5.3] | 0.5 [0.1-4.0]  | 0.88 [0.2-2.0] | 0.6 [0.1-5.3] |
| Injection points; median [range]     | 2.0 [1-8]      | 2.0 [1-8]      | 2.0 [1-12]    | 4.0 [1-14]     | 2.0 [1-8]      | 3.0 [1-6]      | 2.0 [1-14]    |
| Injection guidance; n (%)#           | 24 (26.7)      | 21 (95.5)      | 98 (25.0)     | 4 (6.9)        | 45 (53.6)      | 6 (30.0)       | 198 (29.7)    |
| BoNT-A dose (U); median [range]      |                |                |               |                |                |                |               |
| abobotulinumtoxinA                   | 100 [10-320]   | 100 [100-250]  | 150 [20-600]  | 160 [80-1000]  | 150 [20-1000]  | 300 [200-400]  | 150 [10-1000] |
| incobotulinumtoxinA                  | -              | -              | 40 [20-115]   | 50 [20-60]     | -              | 97.5 [25-150]  | 50 [20-150]   |
| onabotulinumtoxinA                   | 30 [10-80]     | 40 [25-80]     | 50 [10-225]   | 62.5 [20-100]  | 60 [25-200]    | 50 [10-100]    | 50 [10-225]   |
| <b>Levator scapulae</b>              |                |                |               |                |                |                |               |
| N (%)                                | 49 (34.3)      | 21 (52.5)      | 223 (36.0)    | 42 (51.2)      | 58 (51.3)      | 31 (81.6)      | 424 (40.9)    |
| Injected volume (mL); median [range] | 0.35 [0.2-2.5] | 0.4 [0.2-2.0]  | 0.5 [0.1-2.3] | 0.5 [0.1-2.4]  | 0.35 [0.1-1.6] | 0.6 [0.3-1.9]  | 0.4 [0.1-2.5] |
| Injection points; median [range]     | 2.0 [1-4]      | 2.0 [1-3]      | 1.0 [1-5]     | 1.0 [1-4]      | 1.0 [1-3]      | 1.0 [1-3]      | 1.0 [1-5]     |
| Injection guidance; n (%)#           | 16 (32.7)      | 19 (90.5)      | 89 (39.9)     | 3 (7.1)        | 40 (69.0)      | 17 (54.8)      | 184 (43.4)    |
| BoNT-A dose (U); median [range]      |                |                |               |                |                |                |               |
| abobotulinumtoxinA                   | 60 [30-250]    | 150 [100-400]  | 100 [25-480]  | 100 [20-240]   | 100 [30-200]   | 150 [75-300]   | 100 [20-480]  |
| incobotulinumtoxinA                  | -              | -              | 30 [15-90]    | 22.5 [10-40]   | -              | 65 [25-100]    | 40 [10-100]   |
| onabotulinumtoxinA                   | 30 [10-40]     | 27.5 [10-100]  | 30 [10-80]    | 22.5 [20-25]   | 50 [15-80]     | 50 [25-100]    | 30 [10-100]   |
| <b>Semispinalis capitis</b>          |                |                |               |                |                |                |               |
| N (%)                                | 45 (31.5)      | 16 (40.0)      | 147 (23.7)    | 21 (25.6)      | 36 (31.9)      | 14 (36.8)      | 279 (26.9)    |
| Injected volume (mL); median [range] | 0.7 [0.2-2.5]  | 0.39 [0.2-2.5] | 0.5 [0.1-2.0] | 0.5 [0.2-1.7]  | 0.5 [0.1-3.2]  | 0.4 [0.2-1.0]  | 0.5 [0.1-3.2] |
| Injection points; median [range]     | 2.0 [1-8]      | 2.0 [1-2]      | 2.0 [1-8]     | 2.0 [1-4]      | 1.5 [1-6]      | 1.0 [1-4]      | 2.0 [1-8]     |
| Injection guidance; n (%)#           | 11 (24.4)      | 16 (100.0)     | 55 (37.4)     | 0 (0.0)        | 24 (66.7)      | 6 (42.9)       | 112 (40.1)    |
| BoNT-A dose (U); median [range]      |                |                |               |                |                |                |               |
| abobotulinumtoxinA                   | 120 [40-350]   | 125 [100-250]  | 100 [10-400]  | 100 [40-340]   | 100 [30-240]   | 100 [75-200]   | 100 [10-400]  |
| incobotulinumtoxinA                  | -              | -              | 45 [20-90]    | 25 [20-40]     | -              | 27.5 [15-100]  | 30 [15-100]   |
| onabotulinumtoxinA                   | 37.5 [10-60]   | 35 [10-125]    | 25 [10-70]    | -              | 45 [25-160]    | 47.5 [45-50]   | 30 [10-160]   |

BoNT-A: botulinum neurotoxin type A; mL: millilitre; U: units; USA: United States of America. #denominator = number of patients with an injection in that muscle.
